# Supplementary material for: Active site substitutions delineate distinct classes of eubacterial flap endonuclease
Source: PubMed Central journal article supplement — Biochem J. 2009 Feb 11;418(Pt 2):285–92. doi: 10.1042/BJ20081637 (PMC2650880; doi:10.1042/bj20081637), 2009-02-11
Supplement: bj4180285add.pdf [file bj4180285add.pdf]

SUPPLEMENTARY ONLINE DATA

# Active site substitutions delineate distinct classes of eubacterial flap endonuclease

Lee M. ALLEN<sup>1</sup>, Michael R. G. HODSKINSON<sup>1</sup> and Jon R. SAYERS<sup>2</sup>

The University of Sheffield School of Medicine and Biomedical Sciences, Henry Wellcome Laboratories for Medical Research, Department of Infection and Immunity, Sheffield S10 2RX, U.K.

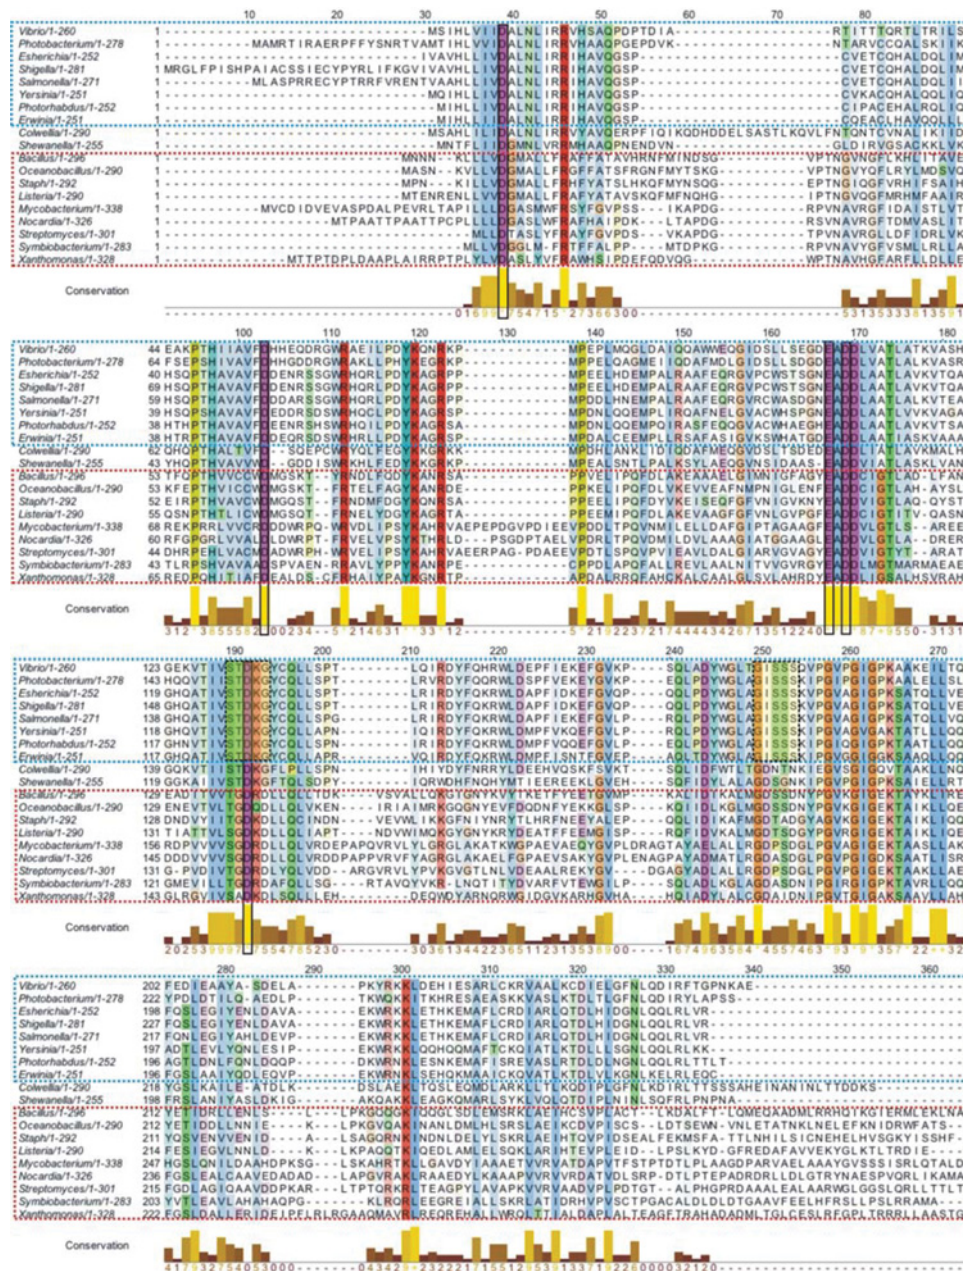

**Figure S1** Multiple sequence alignment of FEN-like paralogues

We examined available sequence depositions with GenBank, based on local sequence alignment (TBLASTN), restricted to organisms recently identified as carrying a Poll FEN paralogue [1]. ClustalW alignments were prepared and coloured using ClustalX annotation [2]. Sequence conservation is depicted by histograms, where yellow represents most highly conserved residues, with strictly conserved residues denoted by asterisks. The absolute conservation of carboxylate ligands at metal site I are highlighted, additionally boxed in black. The two sub-classes are defined by dashed boxes; ExoI family members in blue and FEN family members in red. A double motif was identified to define ExoI, based around the active site substitutions: STDKG (position 190) and GISSS (position 250), with randomised probabilities of  $8.7 \times 10^{-7}$  and  $1.4 \times 10^{-6}$  respectively [3].

<sup>1</sup> These authors contributed equally to this work.  
<sup>2</sup> To whom correspondence should be addressed (email j.r.sayers@shef.ac.uk).

## REFERENCES

- 1 Fukushima, S., Itaya, M., Kato, H., Ogasawara, N. and Yoshikawa, H. (2007) Reassessment of the *in vivo* functions of DNA polymerase I and RNase H in bacterial cell growth. *J. Bacteriol.* **189**, 8575–8583
- 2 Larkin, M. A., Blackshields, G., Brown, N. P., Chenna, R., McGettigan, P. A., McWilliam, H., Valentin, F., Wallace, I. M., Wilm, A., Lopez, R. et al. (2007) Clustal W and Clustal X version 2.0. *Bioinformatics* **23**, 2947–2948
- 3 Combet, C., Blanchet, C., Geourjon, C. and Deleage, G. (2000) NPS@: network protein sequence analysis. *Trends Biochem. Sci.* **25**, 147–150

---

Received 14 August 2008/29 October 2008; accepted 11 November 2008

Published as BJ Immediate Publication 11 November 2008, doi:10.1042/BJ20081637
